# Supplementary material for: Metal-to-insulator transition in SmNiO3 induced by chemical doping: a first principles study
Source: Royal Society of Chemistry journal article supplement (doi:10.1039/c8me00002f), 2018-01-01

Supporting Information for

“Metal-to-insulator transition in  $\text{SmNiO}_3$  induced by chemical doping: a first principles study”

Pilsun Yoo and Peilin Liao

School of Materials Engineering, Purdue University, West Lafayette, IN 47906, United States

**Table S1.** Breathing mode for orthorhombic  $\text{SmNiO}_3$  (O-SNO, Pbnm) and monoclinic  $\text{SmNiO}_3$  (M-SNO,  $P2_1/n$ ) for different magnetic configurations: T-AFM, A-AFM, FM, and PM (paramagnetic). Larger octahedron is denoted as  $N_L$  and smaller octahedron as  $N_S$ , respectively.

| Magnetism | Space group | Octahedron | Octahedron volume ( $\text{\AA}^3$ ) | Volume $N_L/N_S$ (%) | Bader Charge value (e) |
|-----------|-------------|------------|--------------------------------------|----------------------|------------------------|
| PM        | Pbnm        | $N_S$      | 9.44                                 | 0.00                 | 1.165                  |
|           |             | $N_L$      | 9.44                                 |                      | 1.165                  |
|           | $P2_1/n$    | $N_S$      | 9.57                                 | 0.04                 | 1.190                  |
|           |             | $N_L$      | 9.57                                 |                      | 1.121                  |
| FM        | Pbnm        | $N_S$      | 9.65                                 | 0.02                 | 1.211                  |
|           |             | $N_L$      | 9.65                                 |                      | 1.210                  |
|           | $P2_1/n$    | $N_S$      | 9.13                                 | 10.35                | 1.169                  |
|           |             | $N_L$      | 10.18                                |                      | 1.233                  |
| T-AFM     | Pbnm        | $N_S$      | 9.33                                 | 0.00                 | 1.195                  |
|           |             | $N_L$      | 9.33                                 |                      | 1.199                  |
|           | $P2_1/n$    | $N_S$      | 9.12                                 | 10.35                | 1.161                  |
|           |             | $N_L$      | 10.17                                |                      | 1.222                  |
| A-AFM     | Pbnm        | $N_S$      | 9.33                                 | 0.00                 | 1.195                  |
|           |             | $N_L$      | 9.33                                 |                      | 1.199                  |
|           | $P2_1/n$    | $N_S$      | 9.11                                 | 11.26                | 1.167                  |
|           |             | $N_L$      | 10.27                                |                      | 1.223                  |

**Figure S1.** Spin alignment in A-type antiferromagnetism (A-AFM) and T-type AFM (T-AFM). In A-AFM, two adjacent Ni layers have opposite magnetic moments along the [001] direction. On the other hand, T-AFM has more complex magnetic ordering with stairwise parallel magnetic moments.

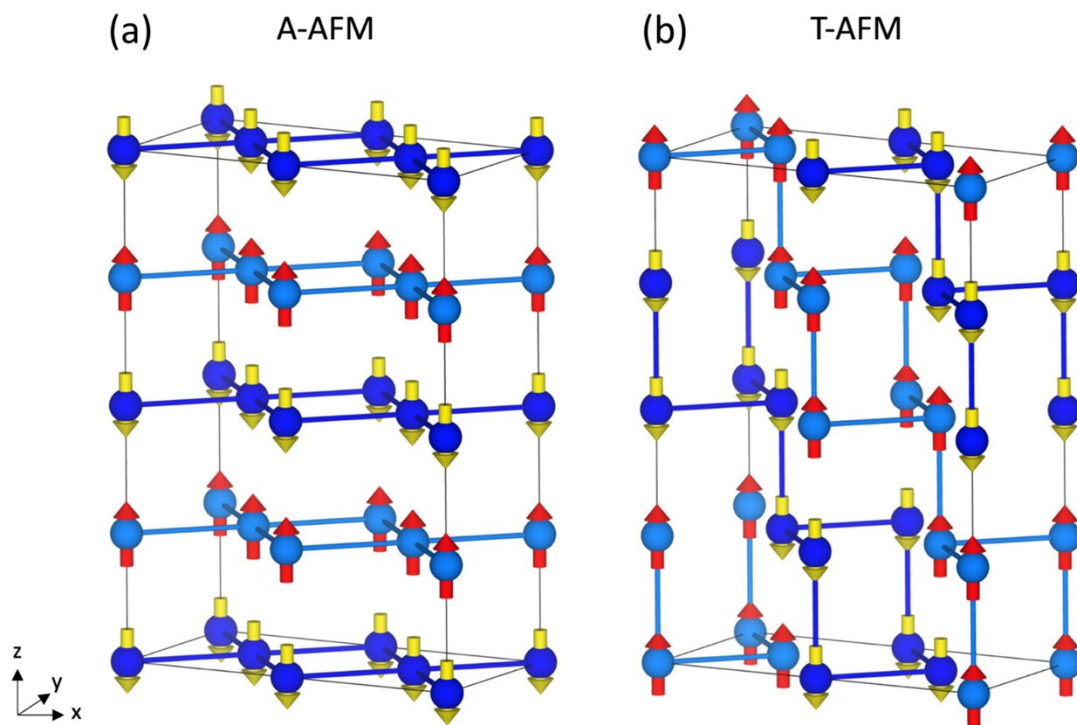

**Figure S2.** Total density of states (TDOS) of orthorhombic  $\text{SmNiO}_3$  (O-SNO,  $Pbnm$ ) and monoclinic  $\text{SmNiO}_3$  (M-SNO,  $P2_1/n$ ) by PBEsol+2: (a) T-AFM of M-SNO, (b) A-AFM of M-SNO, (c) FM of M-SNO, (d) T-AFM of O-SNO (e) A-AFM of O-SNO, and (f) FM of O-SNO.

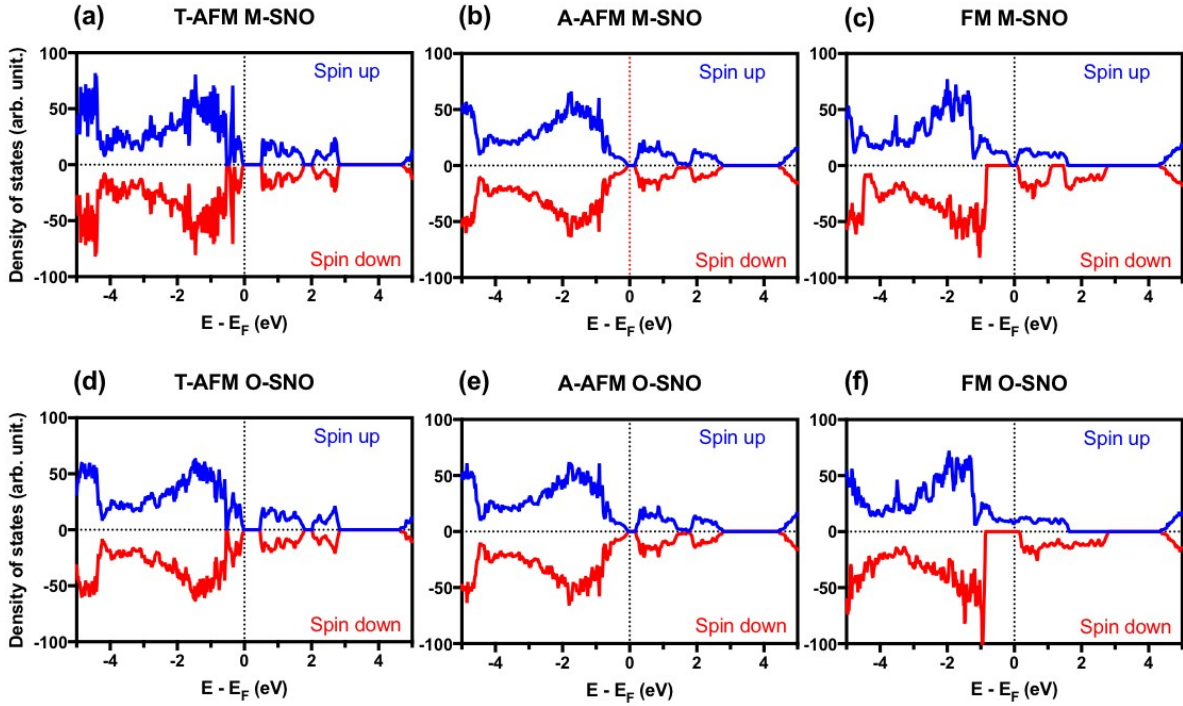

**Figure S3.** TDOS by SCAN functional: (a) T-AFM of M-SNO, (b) A-AFM of M-SNO, (c) FM of M-SNO, (d) T-AFM of O-SNO (e) A-AFM of O-SNO, and (f) FM of O-SNO. Except for A-AFM of O-SNO, all magnetic configurations and symmetry were predicted to be metallic.

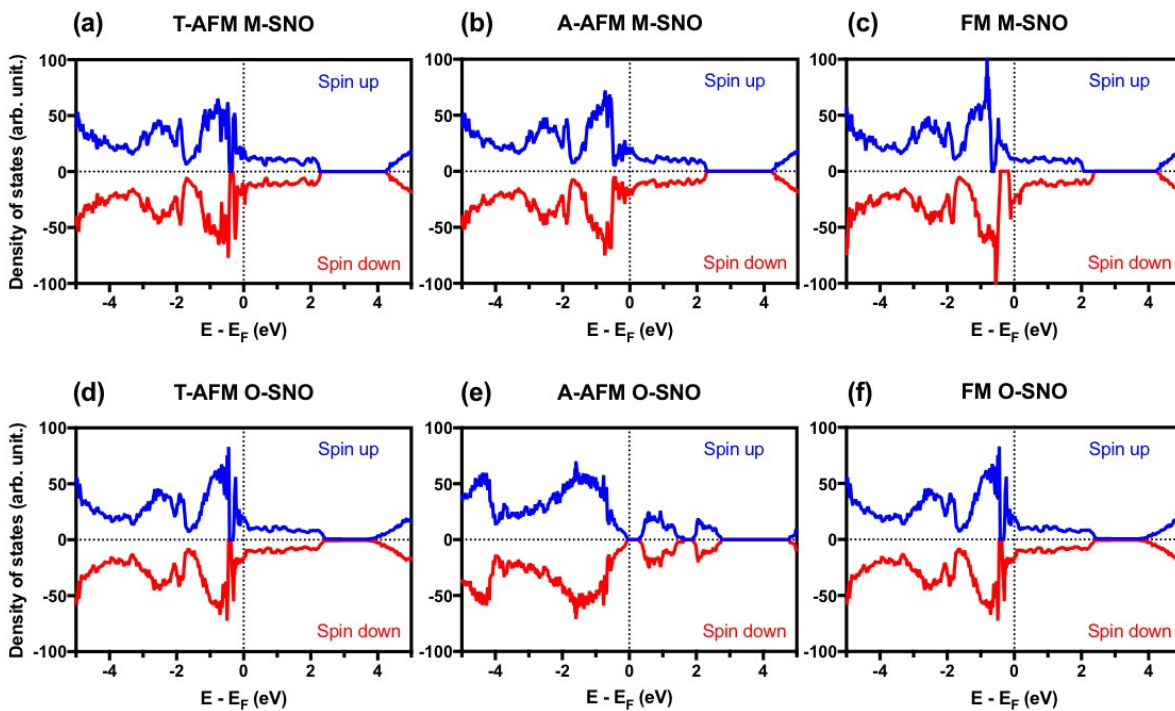

**Figure S4.** (a) Stable hydrogen occupation sites for Ni layer (blue) and Sm layer (yellow) in O-SNO. Several sites that are closer than 1 Å was reduced to one site. (b) Distribution of relative energy for 1 hydrogen occupying Ni or Sm layers in O-SNO.

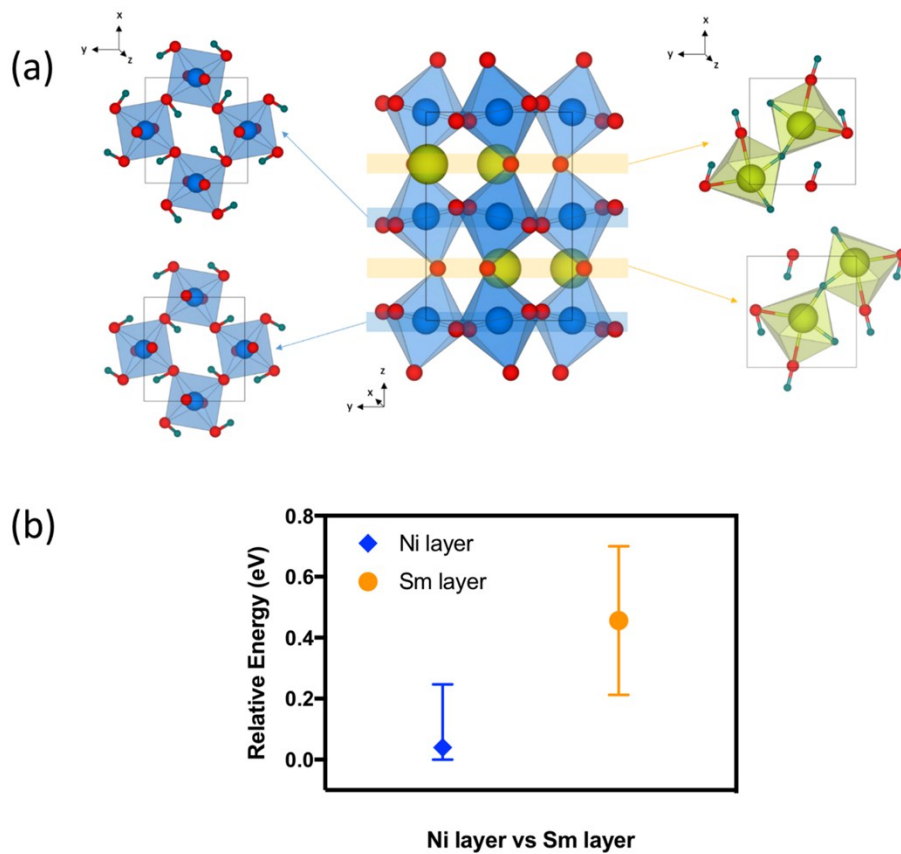

Supplement: c8me00002f2.pdf [file c8me00002f2.pdf]
